# Supplementary material for: Gas-phase spectroscopy of singly reduced tris(bipyridine)ruthenium ions, Ru(bipy)3+
Source: Royal Society of Chemistry journal article supplement (doi:10.1039/c4cp05477f), 2015-01-01
Supplement: c4cp05477f1.pdf [file c4cp05477f1.pdf]

## Supporting Information for

### Gas-phase spectroscopy of singly reduced tris(bipyridine)ruthenium ions, $\text{Ru}(\text{bipy})_3^+$

Camilla Skinnerup Byskov, J. Mathias Weber, and Steen Brøndsted Nielsen

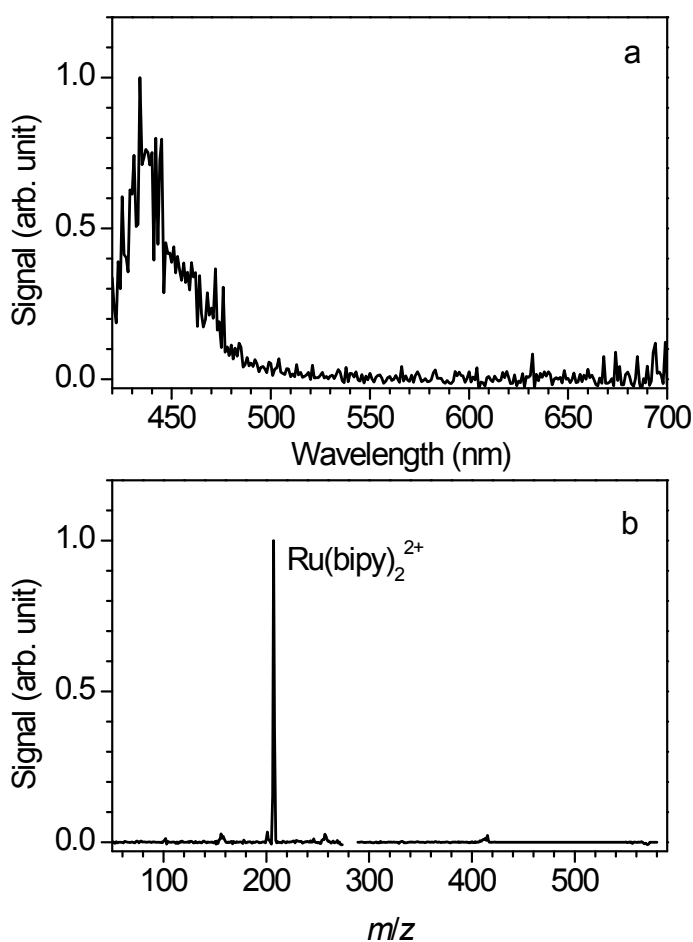

**Photodissociation of  $\text{Ru}(\text{bipy})_3^{2+}$ :** Bottom panel is a photoinduced dissociation mass spectrum obtained at 430 nm. The region near to the parent ion ( $m/z$  285) was not scanned because of saturation of the detector. Top panel is the action spectrum recorded by monitoring the yield of  $\text{Ru}(\text{bipy})_2^{2+}$  versus excitation wavelength.

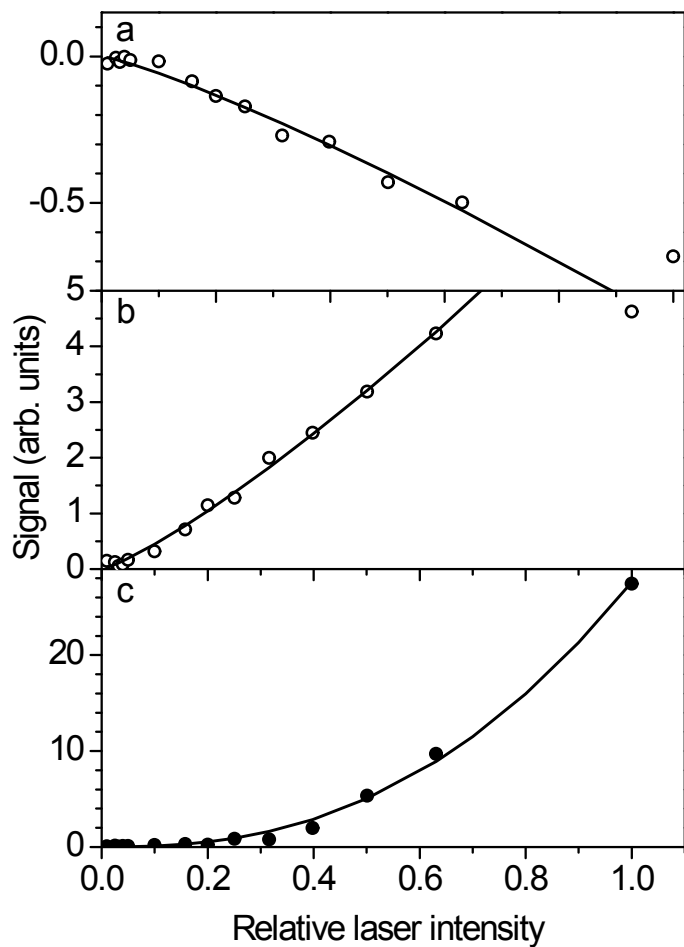

**Power-dependence results:** (a) Depletion of Ru(bipy)<sub>3</sub><sup>+</sup> versus relative laser intensity (1 is max).  $\lambda = 520$  nm. (b) The photo-yield of Ru(bipy)<sub>2</sub><sup>+</sup> versus laser intensity.  $\lambda = 520$  nm. Curves  $a x^{1.2}$  are fit to the data. At high laser powers there is saturation. (c) Production of Ru(bipy)<sub>2</sub><sup>2+</sup> from Ru(bipy)<sub>3</sub><sup>2+</sup>.  $\lambda = 430$  nm. The curve is a  $a x^{2.5}$  fit.

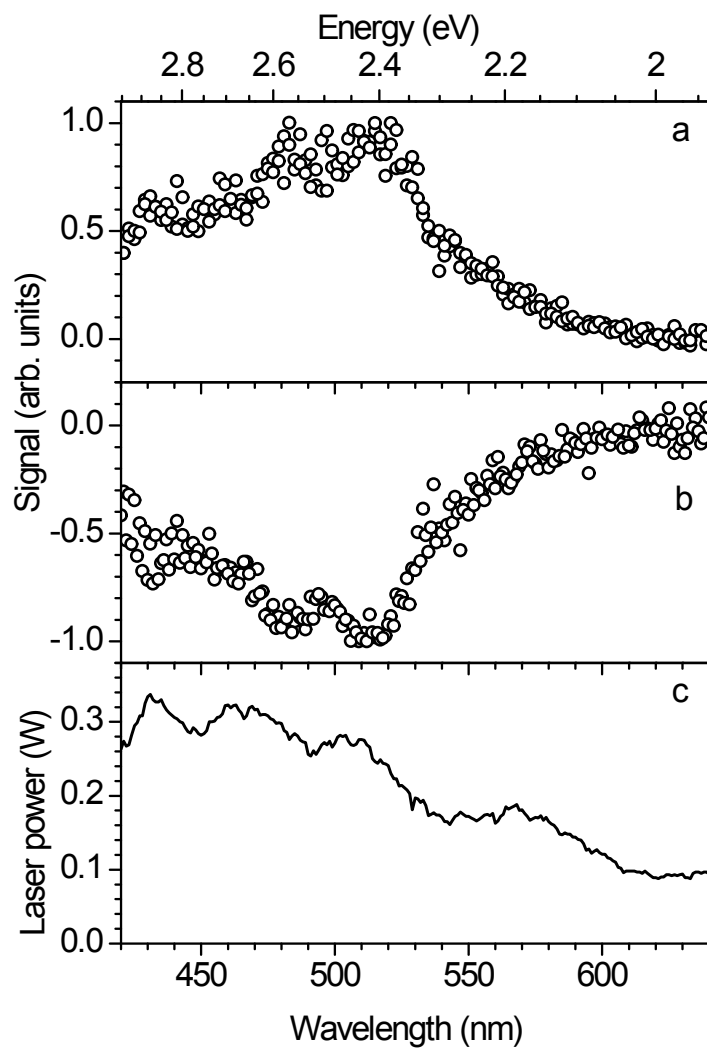

**“Laser on” minus “laser off” signals versus excitation wavelength. (a) Ru(bipy)<sub>2</sub><sup>+</sup>. (b) Ru(bipy)<sub>3</sub><sup>+</sup>. (c) The laser power versus wavelength.**
